# Supplementary material for: CircAFF4 inhibits lung cancer progression via destabilizing GPX4 and triggering ferroptosis
Source: Biol Direct. 2026 Apr 20;21:83. doi: 10.1186/s13062-026-00782-8 (PMC13224429; doi:10.1186/s13062-026-00782-8)
Supplement: Supplementary file 5 — Supplementary Material 5 [file 13062_2026_782_MOESM5_ESM.xlsx]

## Sheet: Figure3
Figure3B						Figure3C						Figure3D				Figure3E

## Sheet: Figure4
Figure4A							Figure4C						Figure4I

## Sheet: Figure5
Figure5A							Figure5B						Figure5C
Figure5D					Figure5E

## Sheet: Figure6
Figure6E
